# Supplementary material for: Nickel tungstate–graphene nanocomposite for simultaneous electrochemical detection of heavy metal ions with application to complex aqueous media
Source: Royal Society of Chemistry journal article supplement (doi:10.1039/c7ra08047f), 2017-01-01
Supplement: c7ra08047f1.pdf [file c7ra08047f1.pdf]

## Supporting Information

### Nickel Tungstate-Graphene Nanocomposite for Simultaneous Electrochemical Detection of Heavy Metal Ions with Application to Complex Aqueous Media

Rudra Kumar,<sup>a#</sup> Thiruvellu Bhuvana,<sup>b##</sup> and Ashutosh Sharma<sup>a\*</sup>

<sup>a</sup>Department of Chemical Engineering, Indian Institute of Technology, Kanpur 208016, India.

<sup>b</sup>Department of Mechanical Engineering, Indian Institute of Technology, Kanpur 208016, India

E-mail: bhuvana@iitk.ac.in; ashutos@iitk.ac.in

# contributed equally

#### XPS

X-ray photoelectron spectroscopy (XPS, PHI 5000 Versa Prob II, FEI, USA) were measured in the range from 0-1100 eV. The chemical bonding and composition were determined by XPS and the survey scan of RGO/NiWO<sub>4</sub> nanocomposite is shown in **Figure S1a**. The peak identified at 36, 68, 112, 259, 284, 426, 496, 531 and 857 eV corresponded to W (4f), Ni (3p), Ni (3s), W (4d), C (1s), W (4p<sub>3/2</sub>), W (4p<sub>1/2</sub>), O (1s), Ni(2p) eV respectively. The high resolution of Ni 2p spectra shown is in the **Figure S1b**. The peak obtained at 856.1eV of Ni 2p<sub>3/2</sub> confirmed the presence of Ni ions in divalent oxidation state.<sup>1</sup> The peak of Ni 2p<sub>1/2</sub> core level was identified at 873.7 eV. Further, the satellite peak at 863.14 eV corresponded to Ni 2p<sub>3/2</sub>. The energy difference of 17.27 eV in between of Ni 2p<sub>3/2</sub> and Ni 2p<sub>1/2</sub> core levels confirmed the Ni<sup>2+</sup> oxidation state. Furthermore, the W 4f<sub>7/2</sub> peak appearing at 35.8 eV and combining with the Ni 2p<sub>3/2</sub> peak at 856.1 eV together suggested the formation of NiWO<sub>4</sub> binary metal oxide.<sup>2</sup> **Figure S1c** showed the high-resolution XPS spectra of W 4f. The peak obtained at 35.8 and 38 eV corresponded to W4f<sub>7/2</sub> and W4f<sub>5/2</sub> respectively. The deconvoluted

O 1s core level spectrum (**Figure S1d**) showed two peaks at 531.4 eV and 533.6 eV, respectively, attributed to the oxygen species in nickel spinel oxide and C=O.<sup>3</sup> The deconvoluted C 1s core level spectrum (**Figure S1e**) showed four binding energies at 284.8 eV, 285.8 eV, 288.4 eV, and 291.0 eV, corresponding to  $sp^2$  and  $sp^3$  hybridized carbon, C–O, and O=C–O functional groups, respectively.<sup>3</sup>

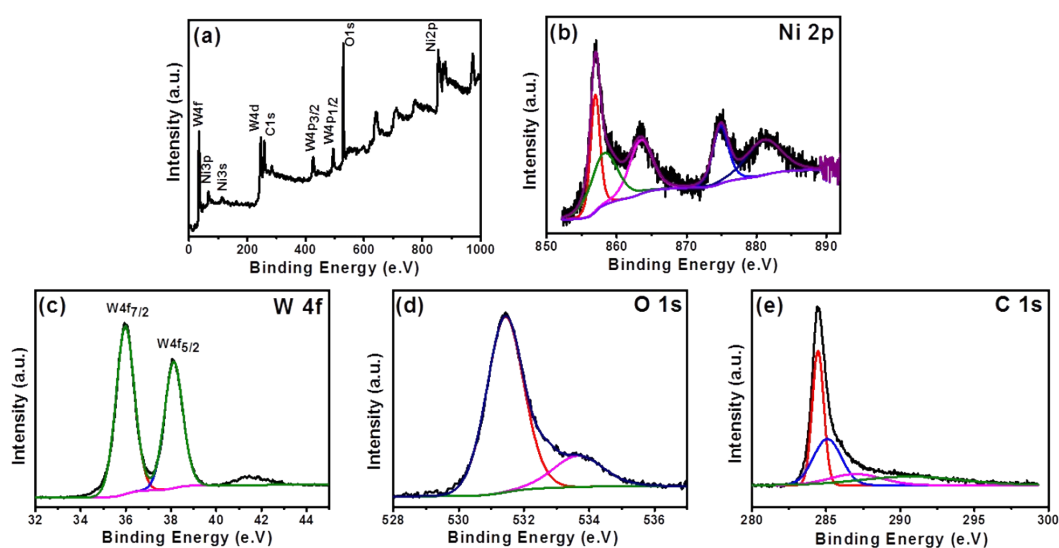

**Figure S1:** XPS of RGO/NiWO<sub>4</sub> nanocomposite (a) survey spectrum, (b) Ni 2p, (c) W 4f, (d) O 1s and (e) C 1s.

Energy dispersive X-ray spectroscopy (EDX) and elemental mapping of RGO/NiWO<sub>4</sub> nanocomposite are shown in **Figure S2** which confirmed the homogeneous distribution of C, O, Ni, and W elements.

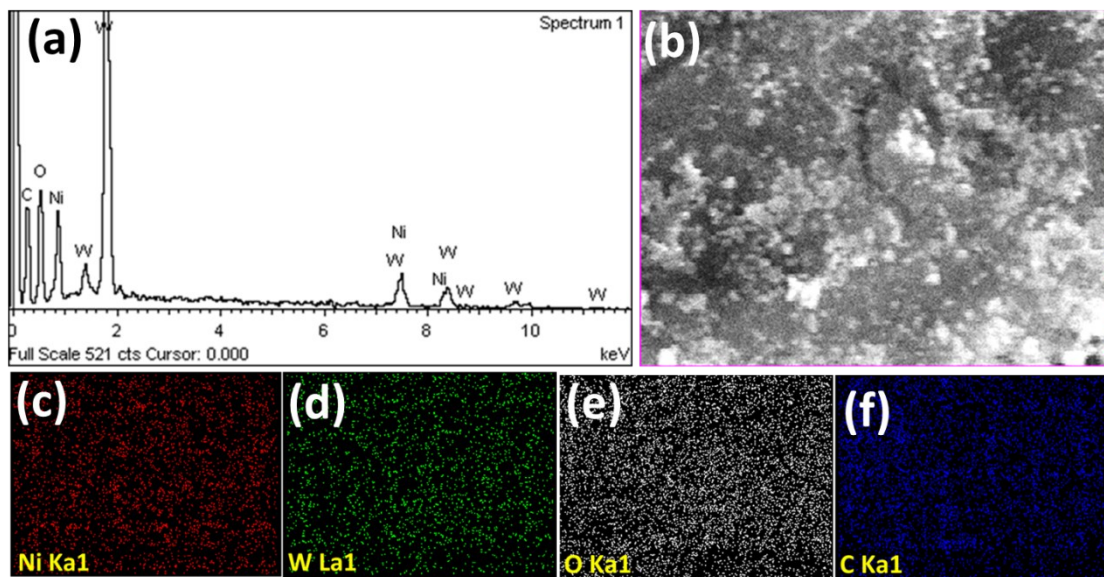

**Figure S2:** (a) EDX of RGO/NiWO<sub>4</sub> nanocomposite, (b) SEM and elemental mapping of Ni, W, O and C (c-f) respectively.

## BET

The specific surface area and total pore volume of NiWO<sub>4</sub> and RGO/NiWO<sub>4</sub> nanocomposite were measured by N<sub>2</sub> adsorption/desorption isotherm using Autosorb iQ-BET, Quantachrome Instruments, USA. **Figure S3a and S3b** showed the nitrogen adsorption desorption isotherm. The Brunauer–Emmett–Teller (BET) surface area of NiWO<sub>4</sub> and RGO/NiWO<sub>4</sub> nanocomposite were 18 m<sup>2</sup> g<sup>-1</sup> and 56 m<sup>2</sup> g<sup>-1</sup>, respectively. The total pore volume of NiWO<sub>4</sub> and RGO/NiWO<sub>4</sub> nanocomposite was 0.016 cm<sup>3</sup> g<sup>-1</sup> and 0.15 cm<sup>3</sup> g<sup>-1</sup>, respectively. The increase in surface area, as well as pore volume of RGO/NiWO<sub>4</sub> nanocomposite, is due to the wrapping of high surface area graphene sheets into NiWO<sub>4</sub> nanoparticles, which also prevented the restacking of graphene sheets. The pore size distribution was determined by Barrett–Joyner–Halenda (BJH) method. Inset of **Figure S3(a-b)** shows the pore size distribution of NiWO<sub>4</sub> and RGO/NiWO<sub>4</sub> nanocomposite, confirmed the mesoporous nature. The pore size of 3.82 nm and 9.54 nm were obtained for NiWO<sub>4</sub> NPs and RGO/NiWO<sub>4</sub>, respectively.

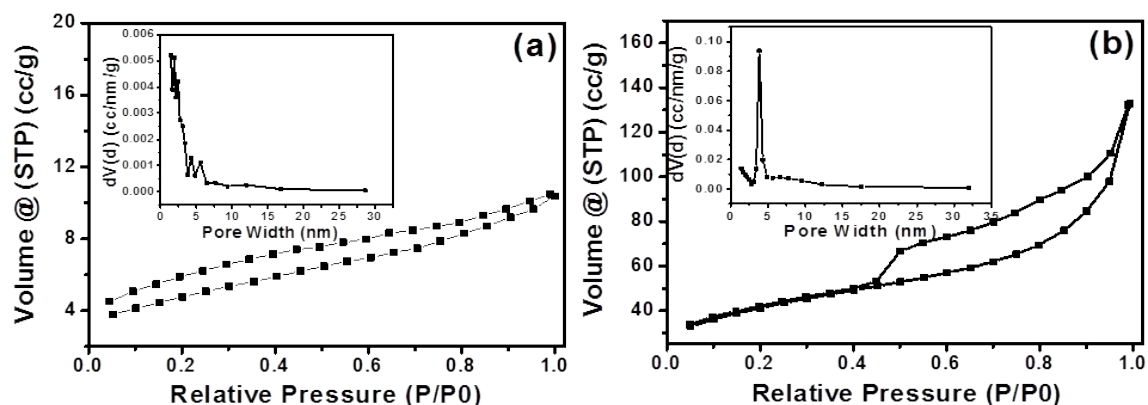

**Figure S3:** N<sub>2</sub> Adsorption-desorption spectra of (a) NiWO<sub>4</sub> NPs and (b) RGO/NiWO<sub>4</sub> nanocomposite and inset showing pore size distribution.

**Table S1:** Comparative study of the electrochemical detection of Cd(II), Pb(II), Cu(II), Hg(II) ions performed for RGO/NiWO<sub>4</sub> nanocomposite electrode.

| Type                     | Analyte | Sensitivity<br>(mA.μM <sup>-1</sup> .cm <sup>-2</sup> ) | LOD<br>(10 <sup>-10</sup> M) | Correlation<br>Coefficient | Intercept |
|--------------------------|---------|---------------------------------------------------------|------------------------------|----------------------------|-----------|
| Individual<br>Analysis   | Cd(II)  | 0.1145                                                  | 4.75                         | 0.9978                     | 0.5419    |
|                          | Pb(II)  | 0.0341                                                  | 3.79                         | 0.9910                     | 5.327     |
|                          | Cu(II)  | 0.0401                                                  | 4.41                         | 0.9986                     | 1.616     |
|                          | Hg(II)  | 0.0683                                                  | 2.83                         | 0.9968                     | 1.0549    |
| Simultaneous<br>Analysis | Cu(II)  | 0.1173                                                  | 1.12                         | 0.9967                     | 0.8899    |
|                          | Hg(II)  | 0.1245                                                  | 1.20                         | 0.971                      | 0.9794    |
| Simultaneous<br>Analysis | Cd(II)  | 0.0622                                                  | 0.12                         | 0.9905                     | 0.7597    |
|                          | Cu(II)  | 0.1411                                                  | 1.16                         | 0.9954                     | 1.6348    |
|                          | Hg(II)  | 0.1651                                                  | 1.36                         | 0.9975                     | 1.6368    |
| Simultaneous<br>Analysis | Pb(II)  | 0.08571                                                 | 2.04                         | 0.9952                     | 3.168     |
|                          | Cu(II)  | 0.07432                                                 | 1.77                         | 0.9983                     | 4.304     |
|                          | Hg(II)  | 0.08094                                                 | 1.92                         | 0.9962                     | 3.742     |
| Simultaneous<br>Analysis | Cd(II)  | 0.00998                                                 | 2.05                         | 0.9883                     | 0.0814    |
|                          | Pb(II)  | 0.0098                                                  | 1.95                         | 0.9943                     | 0.0202    |
|                          | Cu(II)  | 0.01465                                                 | 3.42                         | 0.9958                     | 0.088     |
|                          | Hg(II)  | 0.01401                                                 | 3.41                         | 0.9813                     | 0.0952    |
| Carbonated<br>Drink      | Cd(II)  | 0.0008                                                  | 1.11                         | 0.9965                     | 0.0148    |
|                          | Pb(II)  | 0.0147                                                  | 2.04                         | 0.9999                     | 0.0812    |
|                          | Cu(II)  | 0.0202                                                  | 2.80                         | 0.9883                     | 0.1132    |
|                          | Hg(II)  | 0.2192                                                  | 3.05                         | 0.9929                     | 0.1193    |

|              |        |         |      |        |         |
|--------------|--------|---------|------|--------|---------|
| Milk         | Cd(II) | 0.0027  | 3.83 | 0.9993 | 0.00673 |
|              | Pb(II) | 0.0149  | 2.09 | 0.9984 | 0.00581 |
|              | Cu(II) | 0.0125  | 1.74 | 0.9983 | 0.00547 |
|              | Hg(II) | 0.00671 | 9.34 | 0.9927 | 0.00671 |
| Orange Juice | Cd(II) | 0.0211  | 2.72 | 0.9905 | 0.0299  |
|              | Pb(II) | 0.01634 | 2.26 | 0.9999 | 0.0898  |
|              | Cu(II) | 0.1468  | 2.04 | 0.9870 | 0.022   |
|              | Hg(II) | 0.02073 | 2.88 | 0.9907 | 0.0089  |

**Table S2.** Comparison of LOD from literature for individual and simultaneous detection

| Type                  | Analyte | LOD<br>( $10^{-10}$ M) | Ref     |
|-----------------------|---------|------------------------|---------|
| Individual Analysis   | Cd(II)  | 4.75                   | Present |
|                       | Pb(II)  | 3.79                   |         |
|                       | Cu(II)  | 4.41                   |         |
|                       | Hg(II)  | 2.83                   |         |
| Simultaneous Analysis | Cd(II)  | 2.05                   | 4       |
|                       | Pb(II)  | 1.95                   |         |
|                       | Cu(II)  | 3.42                   |         |
|                       | Hg(II)  | 3.41                   |         |
| Individual Analysis   | Cd(II)  | 3.8                    | 5       |
|                       | Pb(II)  | 2.5                    |         |
|                       | Cu(II)  | 13.0                   |         |
|                       | Hg(II)  | 2.7                    |         |
| Simultaneous Analysis | Cd(II)  | 4.1                    |         |
|                       | Pb(II)  | 5.0                    |         |
|                       | Cu(II)  | 6.6                    |         |
|                       | Hg(II)  | 5.4                    |         |
| Individual Analysis   | Cd(II)  | 4.1                    |         |
|                       | Pb(II)  | 7.2                    |         |
|                       | Cu(II)  | 79.1                   |         |
|                       | Hg(II)  | 6.5                    |         |
| Simultaneous Analysis | Cd(II)  | 24.4                   |         |
|                       | Pb(II)  | 5.7                    |         |
|                       | Cu(II)  | 23.2                   |         |
|                       | Hg(II)  | 24.6                   |         |

Cyclic voltammetry in an aqueous solution of 0.1 M KCl containing 5 mM  $\text{Fe}(\text{CN})_6^{3-}$  in the voltage range of -0.1 V to 0.6 V with scan rate varying from 10 to 100  $\text{mV s}^{-1}$ . The results are shown in **Figure S4** in Supporting Information. It is clear that as the scan rate increases, the

anodic and cathodic peak current increases linearly (see **Figure S4a**). A plot of anodic and cathodic peak current versus scan rate is also shown in **Figure S4b**. A linear trend indicates that this process is surface confined and thus adsorption controlled process.

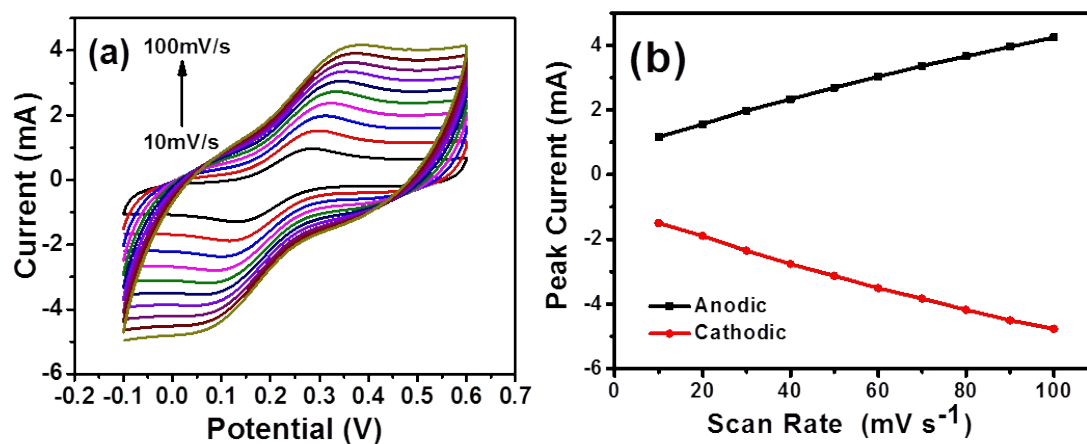

**Figure S4:** (a) Cyclic voltammograms at different scan rates from 10 to 100 mV s<sup>-1</sup> and (b) plot of the anodic and cathodic peak current versus the scan rate.

Figure S5 shows the XPS spectra of RGO/NiWO<sub>4</sub> nanocomposite electrode after 50 CV cycles and before the stripping of heavy metals are performed. The peak positions of C 1s, O 1s, Ni 2p and W4f are similar to our nanocomposite (Figure S1). The extra peak appears in the survey scan at 685 eV corresponded to fluoride ions from the PVDF binder during the electrode preparation. In Figure S6, peaks of Cd 3d, Hg 4f, Cu 2p, and Pb 4f appeared along with C 1s, O 1s, Ni 2p and W4f, signifying the adsorption of heavy metal ions on the surface of the electrode. The peak positions after the stripping analysis are also comparable to the pristine and cycled samples.

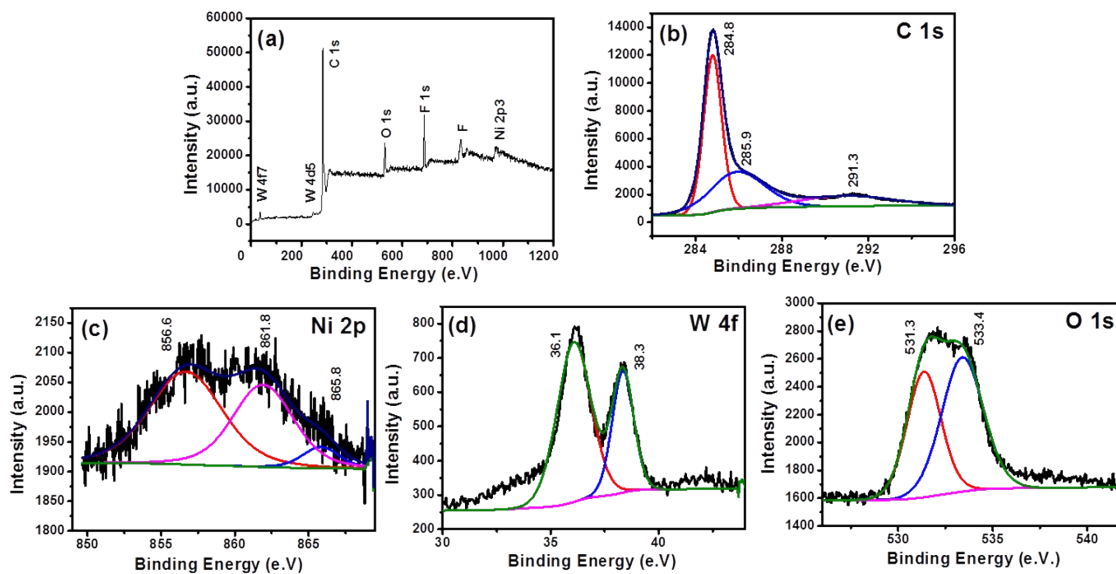

**Figure S5:** XPS of RGO/NiWO<sub>4</sub> nanocomposite electrode after 50 cycling but before DPASV (a) survey spectrum, (b) C 1s, (c) Ni 2p, (d) W 4f and (e) O 1s.

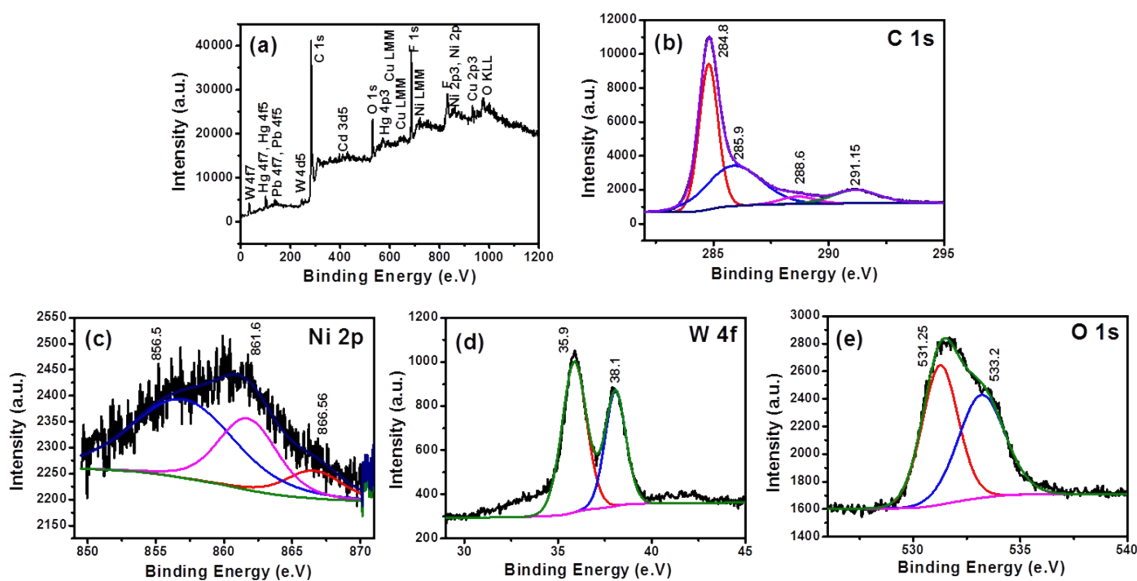

**Figure S6:** XPS of RGO/NiWO<sub>4</sub> nanocomposite electrode after 50 cycling and DPASV (a) survey spectrum, (b) C 1s, (c) Ni 2p, (d) W 4f and (e) O 1s.

## References

1. B. P. Payne, A. P. Grosvenor, M. C. Biesinger, B. A. Kobe and N. S. McIntyre, *Surface and Interface Analysis*, 2007, **39**, 582-592.

2. M. C. Biesinger, B. P. Payne, A. P. Grosvenor, L. W. M. Lau, A. R. Gerson and R. S. C. Smart, *Applied Surface Science*, 2011, **257**, 2717-2730.
3. R. Kumar, K. Jahan, R. K. Nagarale and A. Sharma, *Industrial & Engineering Chemistry Research*, 2015, **54**, 10183-10189.
4. P. Veerakumar, V. Veeramani, S.-M. Chen, R. Madhu and S.-B. Liu, *ACS Applied Materials & Interfaces*, 2016, 8, 1319-1326.
5. R. Madhu, K. V. Sankar, S.-M. Chen and R. K. Selvan, *RSC Advances*, 2013, 4, 1225-1233.
